# Supplementary material
Source: HighWire-hosted journal article supplement (https://cmajopen.ca/highwire/filestream/90256/field_highwire_adjunct_files/0/open-2022-0238-1-at.pdf)
Supplement: open-2022-0238-1-at.pdf [file open-2022-0238-1-at.pdf]

## Appendix A: Interview Questions and Guide

### Study Questionnaire

1. Age
2. How long have you worked in LTC
3. What is your role in the LTC home(s) you work in (ex. NP, attending physician, medical director)
4. Did your end-of-life care in LTC include virtual care during the COVID-19 Pandemic?
5. Do you have extra training in addition to residency? Please describe (ex. CAC in palliative care or Care of Elderly)
6. Are you a member of any of the following LTC and Palliative care organizations/ communities of practice? (select all that apply).
  - a. Ontario Long-Term Care Clinicians
  - b. OMA Section on Palliative Medicine
  - c. OMA Section on LTC/ Care of the Elderly
  - d. Other, please specify

### Interview Guide

#### Palliative approach and end-of-life care experience

1. How would you describe your experience practicing as a clinician in providing palliative and end-of-life care in your LTC home(s) during the COVID-19 pandemic?
2. Please tell me about an impactful or memorable end-of-life experience in your LTC home during COVID-19.
3. How has your understanding and practice of a palliative approach to care been impacted by the COVID-19 pandemic?

#### Impact on clinicians and families

4. How has the COVID-19 pandemic impacted you either professionally or personally?
5. What is your understanding of residents and families' perceptions of the end-of-life care received by their loved ones during the COVID-19 pandemic?

#### Clinician's preparedness in providing a palliative approach to care

6. How prepared did you feel to provide quality palliative approach and end-of-life care in your LTC home during COVID-19, in the spring of 2020? How about during the second wave, and now?

7. What types of supports or resources did you find most valuable in helping you provide a palliative approach to care during this time?

Recommendations for the future

8. What suggestions do you have to your LTC home and the system moving forward about providing a quality palliative approach to care and end-of-life care?
